# Supplementary material for: Key Genes in the Jaz Signaling Pathway Are Up-regulated Faster and More Abundantly in Caterpillar-resistant Maize
Source: Research Square preprint supplement (doi:10.21203/rs.3.rs-506814/v1), 2021-06-01
Supplement: Supplementary file 1 [file 072fc0652bb1f5caf0ffa5bb.xlsx]

## Sheet: Table S1
Supplemental Table 1 List of COI1 genes in Arabidopsis, rice, and maizea
Protein name	Accession no.	Chrom	Spl	gDNA (bp)	Protein (aa)	Exon
AtCOI1	AT2G39940	2	1	3256	592	3
OsCOI1a	Os01g63420	1	3	4170	630	3
OsCOI1b	Os05g37690	5	1	3143	598	3
OsCOI2	Os03g15880	3	5	5512	589	3
ZmCOI1a	GRMZM2G125411	3	1	4019	598	3
ZmCOI1b-1	GRMZM2G151536	8	3	3534	599	3
ZmCOI1b-2	GRMZM2G353209	6	1	3498	599	3
ZmCOI2	GRMZM2G079112	1	2	3155	591	3/1
a Arabidopsis thaliana (At) genome data from TAIR (http://www.arabidopsis.org);
Zea Mays (Zm) genome data from Gramene (http://www.maizesequence.org);
Oryza sativa (Os) genome data from TIGR (http://rice.plantbiology.msu.edu);

## Sheet: Table S2
Supplemental Table 2 List of MYC2 genes in Arabidopsis, rice, and maizea
Protein name	Accession no.	Chrom	Spl	gDNA (bp)	Protein (aa)	Exon
AtMYC2	AT1G32640	1	1	2179	623	1
OsMYC2	Os10g42430	10	1	2764	751	1
ZmMYC2a (7E)	GRMZM2G001930	1	1	2817	705	1
ZmMYC2b	GRMZM2G049229	9	1	2904	703	1
a Arabidopsis thaliana (At) genome data from TAIR (http://www.arabidopsis.org);
Zea Mays (Zm) genome data from Gramene (http://www.maizesequence.org);
Oryza sativa (Os) genome data from TIGR (http://rice.plantbiology.msu.edu);

## Sheet: Table S3
Supplemental Table 3 Primers used in qRT-PCR
	Accession No.	Forward Primer	Reverse Primer
ZmActin	U60511	GGAGCTCGAGAATGCCAAGAGCAG	GACCTCAGGGCATCTGAACCTCTC
ZmJAZ1	MT554628/MT554629	GCCGATTGCAAGGAGGAAT	ATCCTGTCCTTTCTCTTCTC
ZmJAZ2	MT554630/MT554631	GCTGACCCTAGCTCAATAAGCAA	AGTGCCTCCTGGCAATGG
ZmJAZ3	MT554632/MT554633	TGCCTATTATGAGGAAGGCTTCTC	TGCATTGAGGCGATCCTTTC
ZmCOI1	DAA56799	AGAGCGCTTATCGGGTGATG	CCTGGGCATGGGTGTCAA
ZmMYCa	DAA46409	TCACCGATACCGAGTGGTTCT	GGCCCGAACCGTTGAGA
ZmMYCb	AFW87749	ACCGACACCGAGTGGTTCTT	CGAGCCGTTGAGGAAGGA
ZmLOX1	AF271894	CGTTCCGTGAAGTGTGGTTCT	CTGTAAGGAGTACTTGGCATATTTGC
ZmAOS	AY488135	CAAACCGACGAATTTGAGCAA	GGAGGCTCGCAACAAGTTG
ZmOPR2	AY921639	CAAAGCGAGCAACAGAGCAG	CTATTTGCTCTCGGTCGGTCA

## Sheet: Table S4
Supplemental Table 4 Percentage identity between maize inbred line Mp708 and Tx601 for homologous JAZ genesa
(a)
		Mp708-Tx601
Gene	gDNA	cDNA	protein
JAZ1a	99.6	99.2	99.1
JAZ1b	99.3	92.7	94.7
JAZ2a	99.4	99.8	99.5
JAZ2b	100	-	-
JAZ3-1a	99.6	99.3	99.1
JAZ3-1b	100	99.2	100
(b)
	ZmJAZ1b	ZmJAZ2a	ZmJAZ2b	ZmJAZ3-1a	ZmJAZ3-1b
ZmJAZ1a	82.9	42	44.2	54.3	53.9
ZmJAZ1b		41.8	43.2	54.5	54.1
ZmJAZ2a			89.3	38.8	38.2
ZmJAZ2b				39.4	38.7
ZmJAZ3-1a					90.2
a predicted coding sequences of ZmJAZs from maize genome database (maizesequence.org) are used

## Sheet: Table S5
Supplemental Table 5 List of representative JAZ homologs from maize and other plants inducible to feeding (F), or wounding (W) or MeJA (JA)
Species	Gene Name	Accession number	Protein Similarity (%)			Induced Expression	Reference
			CMID	TIFY	Jas
Arabidopsis thaliana	AtJAZ1	AT1G19180	52	44.8	75	F, W, JA	Thines et al., 2007; Chung et al., 2008
Hevea brasiliensis	HbJAZ1	GQ369508	56	48.3	78	W, JA	Tian et al., 2010; Pirrelo et al., 2014
Malus × domestica Borkh.	MdJAZ15	MDP0000871409	48	48	69	JA	Li et al., 2014
Nicotiana attenuata	NaJAZh	JQ172766	44	51.7	78	W, JA	Oh et al., 2012
Nicotiana tabacum	NtJAZ1	AB433896	46	48.3	78	W, JA	Shoji, T. et al., 2008; Oh et al., 2012
Nicotiana tabacum	NtJAZ3	AB433898	54	51.7	78	W, JA	Shoji, T. et al., 2008; Oh et al., 2012
Oryza sativa	OsJAZ8/1	LOC_Os09g26780	72	89.7	78	W, JA	Ye et al., 2009
Oryza sativa	OsJAZ7/3-1	LOC_Os07g42370	39	66	72	W, JA	Hakata et al., 2017
Solanum lycopersicum	SlJAZ1	EF591123	50	48.3	75		Thines et al., 2007
Vitis vinifera	VvJAZ4	XM_002272327	59	41.4	81	JA	Zhang et al., 2012
Vitis vinifera	VvJAZ9	XM_002277121	56	48.3	75	JA	Zhang et al., 2012
Zea mays	ZmJAZ1a	GRMZM2G116614	100	100	100	F, W, JA	this study
Zea mays	ZmJAZ1b	GRMZM2G005954	74	86.2	100	F, W, JA	this study
